# Supplementary material for: Tumor Necrosis Factor-alpha utilizes MAPK/NFκB pathways to induce cholesterol-25 hydroxylase for amplifying pro-inflammatory response via 25-hydroxycholesterol-integrin-FAK pathway
Source: PubMed Central journal article supplement (PMC8457477; doi:10.1371/journal.pone.0257576), 2021-09-22

# S1 Figure

**A**

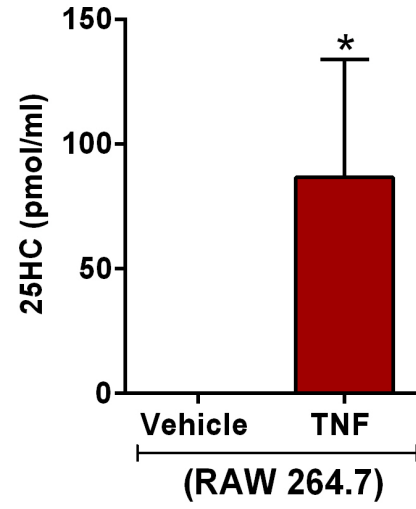

**B**

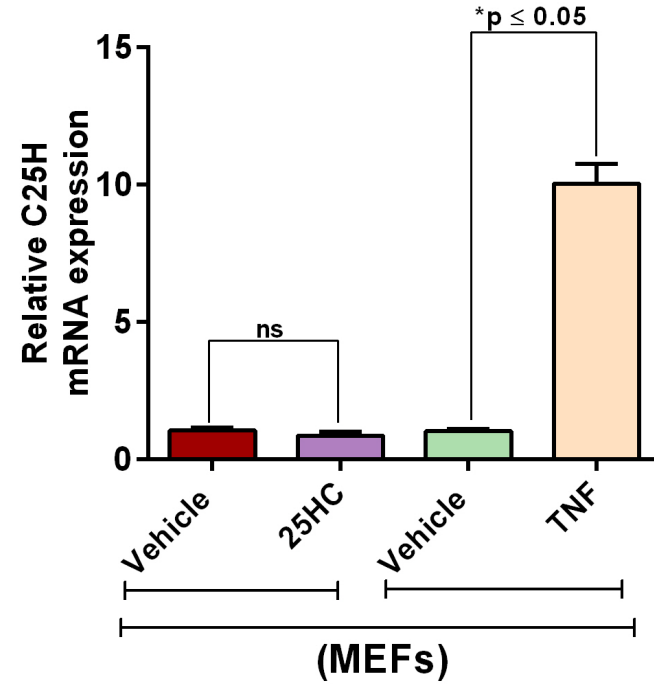

Supplement: pone.0257576.s001.pdf [file pone.0257576.s001.pdf]
