# Supplementary material for: Tumor Necrosis Factor-alpha utilizes MAPK/NFκB pathways to induce cholesterol-25 hydroxylase for amplifying pro-inflammatory response via 25-hydroxycholesterol-integrin-FAK pathway
Source: PubMed Central journal article supplement (PMC8457477; doi:10.1371/journal.pone.0257576), 2021-09-22

S1 Raw Images

Blots associated with Fig. 1c

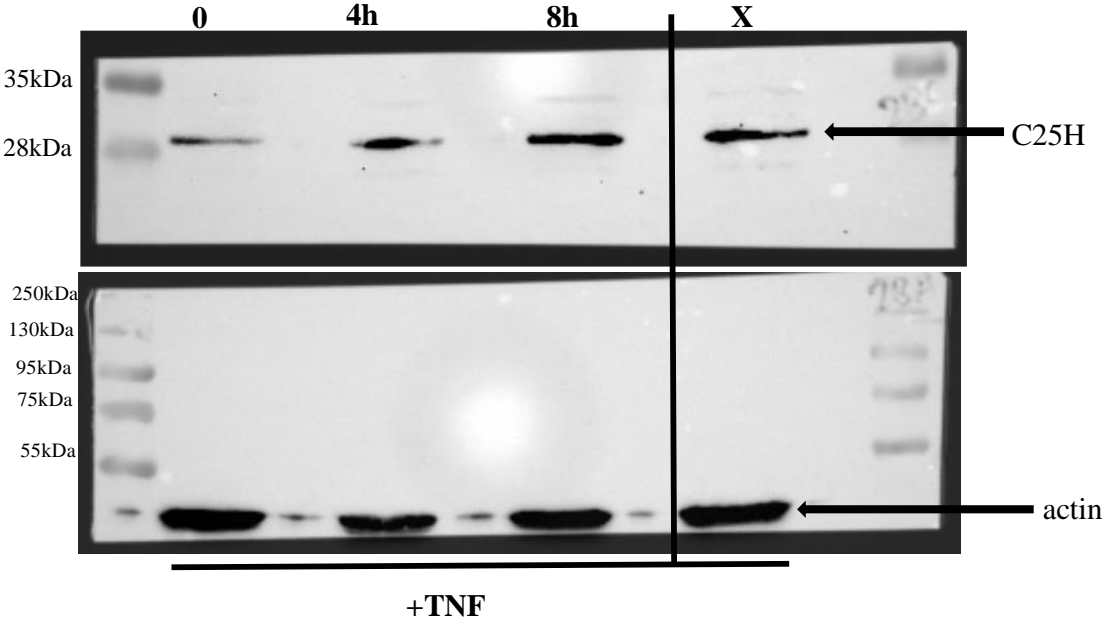

S1 Raw Images

Blots associated with Fig. 1e

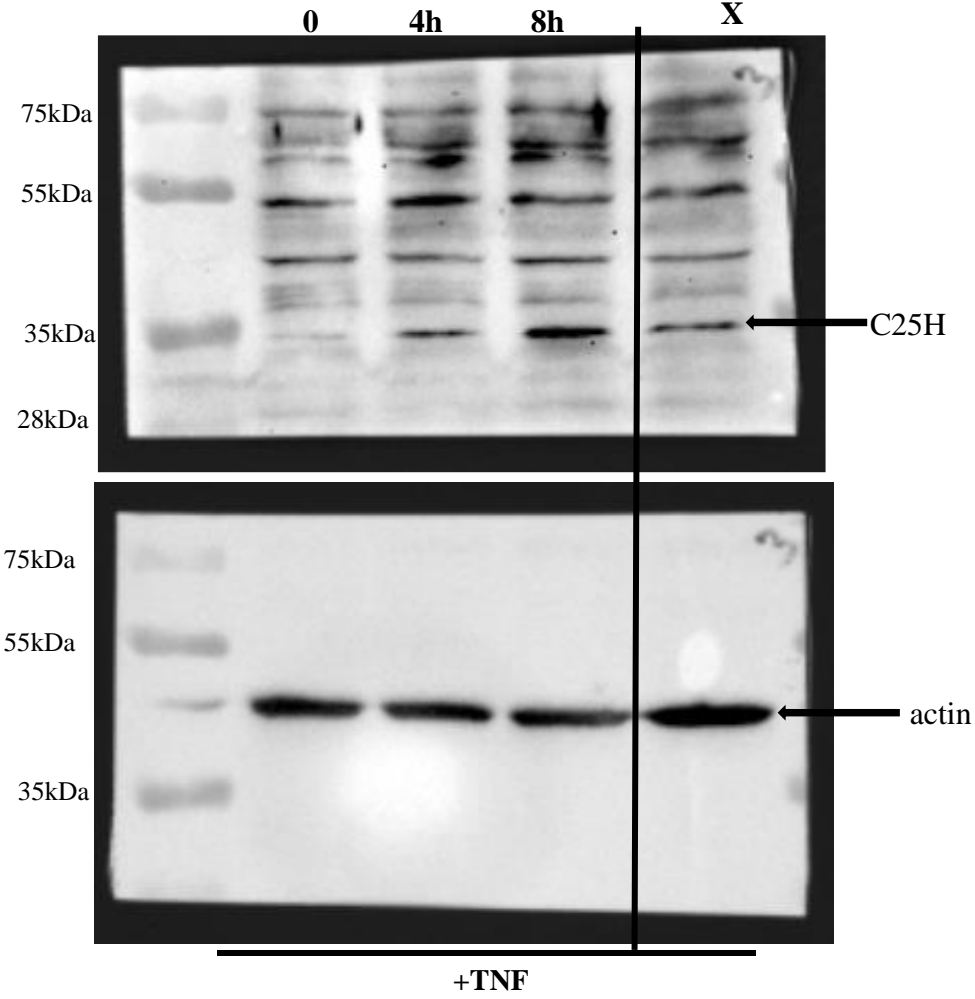

S1 Raw Images

Blots associated with Fig. 1g

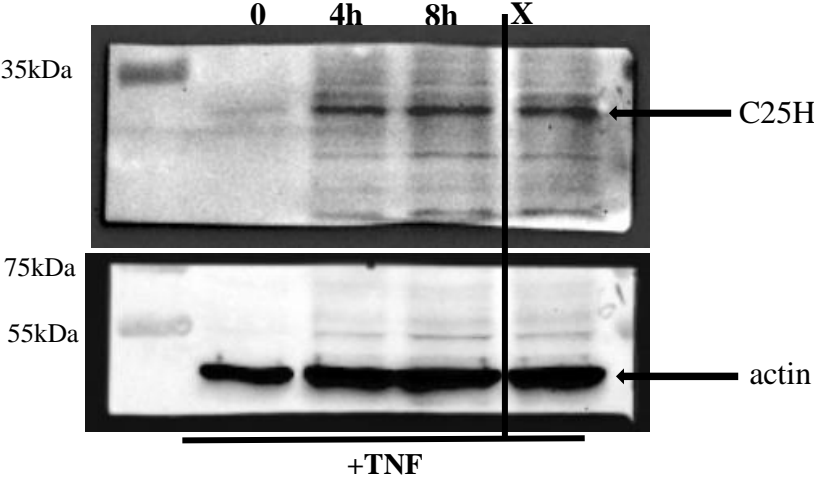







# S1 Raw Images

Blots associated with Fig. 4b

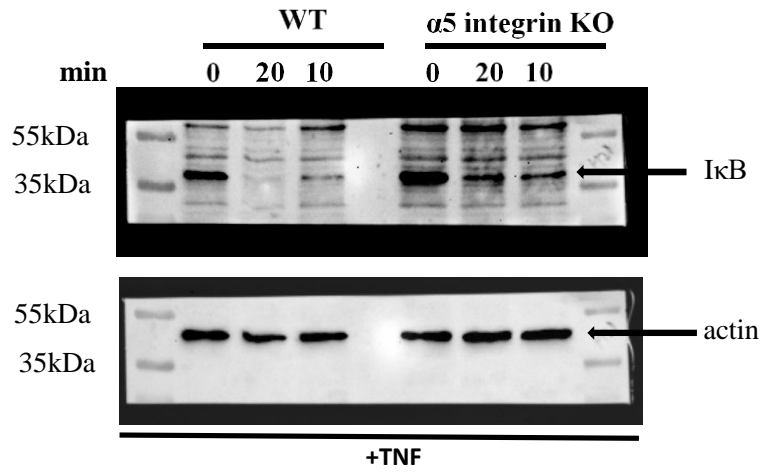

S1 Raw Images

Blots associated with Fig. 5b

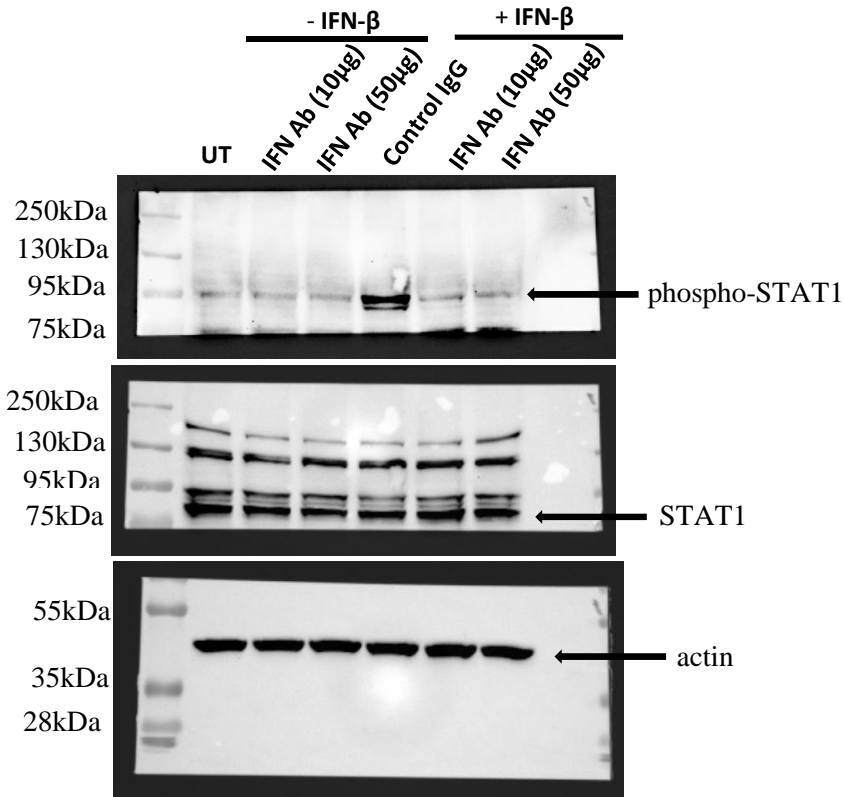



S1 Raw Images

Blots associated with Fig. 6e

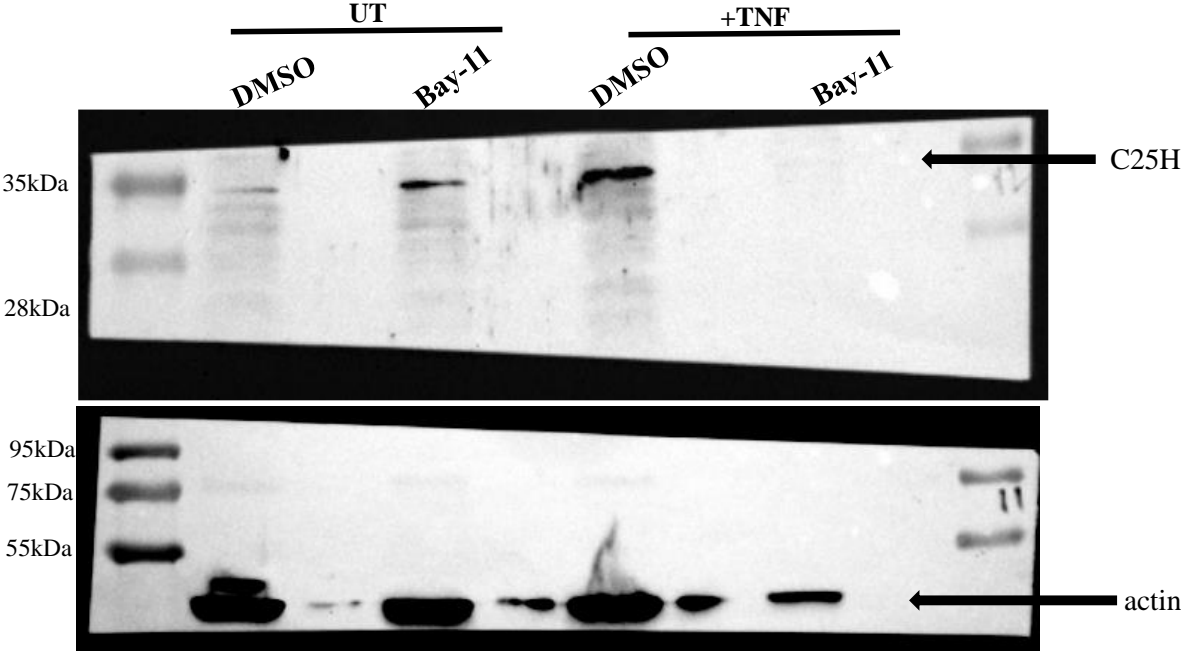

S1 Raw Images

Blots associated with Fig. 6g

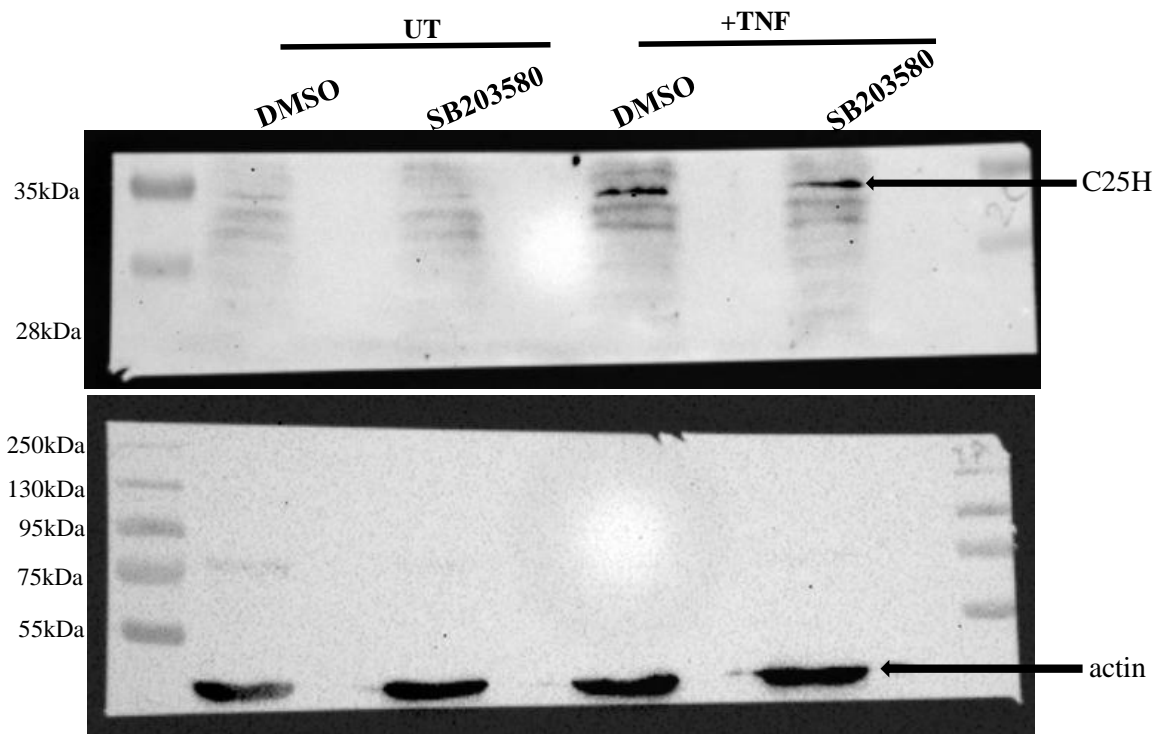

Supplement: pone.0257576.s003.pdf [file pone.0257576.s003.pdf]
